# Supplementary material
Source: ML conference proceedings conference paper supplement (https://openaccess.thecvf.com/content/CVPR2023/html/Hu_Physically_Realizable_Natural-Looking_CVPR_2023_paper.html)
Supplement: Supplementary file 1 [file Hu_Physically_Realizable_Natural-Looking_CVPR_2023_supplemental.zip]

Archive with 4 entries (4 files):
- Supplementary_Video.mp4
- __MACOSX/._Supplementary_Video.mp4
- Supplementary_Text.pdf
- __MACOSX/._Supplementary_Text.pdf
